# Supplementary material for: Isolation, Characterization and Neuroprotective Activity of Folecitin: An In Vivo Study
Source: MDPI journal article supplement (doi:10.3390/life11080825), 2021-08-12
Supplement: s1 [file s1]

**Table S1.** <sup>1</sup>H and <sup>13</sup>C-NMR data of compound 1.

| POSITION | <sup>1</sup> H               | <sup>13</sup> C |
|----------|------------------------------|-----------------|
| 1        |                              |                 |
| 2        |                              | 156.9           |
| 3        |                              | 134.60          |
| 4        |                              | 178.14          |
| 5        |                              | 161.7           |
| 6        | 6.19 (d, $J = 2.0$ Hz)       | 99.1            |
| 7        |                              | 145.6           |
| 8        | 6.38 (d, $J = 2.0$ Hz)       | 94.02           |
| 9        |                              |                 |
| 10       |                              | 104.5           |
| 1'       |                              | 121.50          |
| 2'       | 7.30 (d, $J = 2.0$ Hz)       | 116.04          |
| 3'       |                              | 145.6           |
| 4'       | -                            | 148.83          |
| 5'       | 6.90 (d, $J = 8.0$ Hz)       | 115.85          |
| 6'       | 7.25 (dd, $J = 8.0, 2.0$ Hz) | 121.11          |
| 1''      |                              |                 |
| 2''      | 5.24 (d, $J = 1.5$ Hz)       | 102.22          |
| 3''      | 4.59 (dd, $J = 3.5, 1.5$ Hz) | 70.44           |
| 4''      | 3.23 (m)                     | 71.56           |
| 5''      | 3.50 (dd, $J = 9.5, 3.5$ Hz) | 70.73           |
|          | 3.49 (m)                     | 70.98           |
| 6''      | 0.807 (d, $J = 6.0$ Hz)      | 17.90           |

**Table S2.** Figure 6 Densitometry readings/intensity ratio.

| pJNK |     |       |     | NFkB |     |       |     | TNF- $\alpha$ |     |       |      |
|------|-----|-------|-----|------|-----|-------|-----|---------------|-----|-------|------|
| C    | Eth | Eth+F | F   | C    | Eth | Eth+F | F   | C             | Eth | Eth+F | F    |
| 1.05 | 3.7 | 2.7   | 2   | 1.05 | 4   | 2.6   | 1.6 | 1.05          | 1.6 | 1.1   | 1.2  |
| 0.95 | 3.6 | 2.5   | 2.1 | 0.95 | 3.9 | 2.5   | 1.5 | 0.95          | 1.7 | 1.2   | 1.25 |
| 1    | 3.8 | 2.4   | 1.9 | 1    | 4.1 | 2.7   | 1.7 | 1             | 1.5 | 1.15  | 1.1  |

**Table S3.** Figure 7 Densitometry readings/intensity ratio.

|              | C |      |      | Eth |     |     | Eth+F |     |     | F    |      |      |
|--------------|---|------|------|-----|-----|-----|-------|-----|-----|------|------|------|
| NLRP3        | 1 | 1.05 | 0.95 | 3.5 | 3.4 | 3.3 | 1.9   | 1.8 | 1.7 | 1.1  | 1.2  | 1.3  |
| ASC          | 1 | 1.05 | 0.95 | 2.7 | 2.8 | 2.6 | 1.6   | 1.5 | 1.4 | 1.05 | 1.25 | 1.35 |
| Caspase-1    | 1 | 1.05 | 0.95 | 3   | 2.9 | 2.8 | 1.1   | 1.2 | 1.3 | 1.6  | 1.5  | 1.7  |
| IL-1 $\beta$ | 1 | 1.05 | 0.95 | 2.5 | 2.4 | 2.6 | 1.3   | 1.2 | 1.4 | 1.1  | 1.15 | 1.25 |

Table S4. Figure 8 Densitometry readings/intensity ratio.

| BCL-2     |      |       |      | BAX   |     |       |      |
|-----------|------|-------|------|-------|-----|-------|------|
| C         | Eth  | Eth+F | F    | C     | Eth | Eth+F | F    |
| 1.05      | 0.5  | 1     | 0.9  | 1.05  | 2   | 1.4   | 1.2  |
| 0.95      | 0.6  | 0.8   | 0.85 | 0.95  | 2.1 | 1.2   | 1.25 |
| 1         | 0.4  | 0.7   | 0.75 | 1     | 2.2 | 1.3   | 1.1  |
| C         |      | Eth   |      | Eth+F |     | F     |      |
| 1         | 1.05 | 0.95  | 3.5  | 3.4   | 3.3 | 1.9   | 1.8  |
| 1         | 1.05 | 0.95  | 2.1  | 2.2   | 2   | 0.9   | 1    |
| BAX/BCL-2 |      |       |      |       |     |       |      |
| C         | Eth  | Eth+F | F    |       |     |       |      |
| 1.05      | 2.5  | 2     | 1.7  |       |     |       |      |
| 0.95      | 2.6  | 2.1   | 1.5  |       |     |       |      |
| 1         | 2.7  | 2.2   | 1.4  |       |     |       |      |

|             |                          |                        |         |                 |                      |
|-------------|--------------------------|------------------------|---------|-----------------|----------------------|
| Sample Name | HOL-1                    | Position               | Vial 41 | Instrument Name | Instrument 1         |
| User Name   |                          | Inj Vol                | 2       | InjPosition     |                      |
| Sample Type | Sample                   | IRM Calibration Status | Success | Data Filename   | HOL-1.d              |
| ACQ Method  | POSITIVE ION METHOD MS.m | Comment                |         | Acquired Time   | 03-May-21 1:17:34 PM |

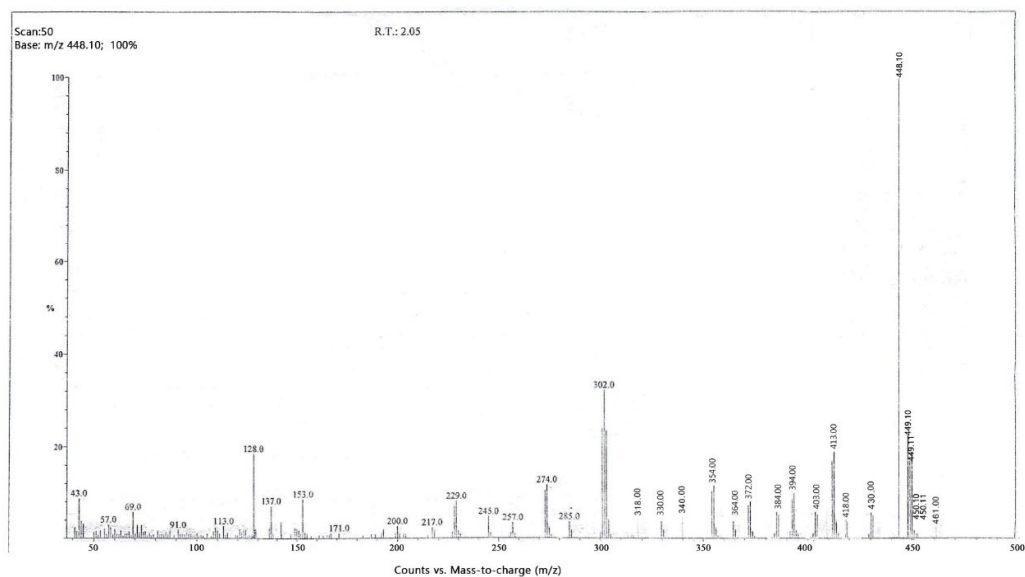

Figure S1. Mass spectrum of compound 1.

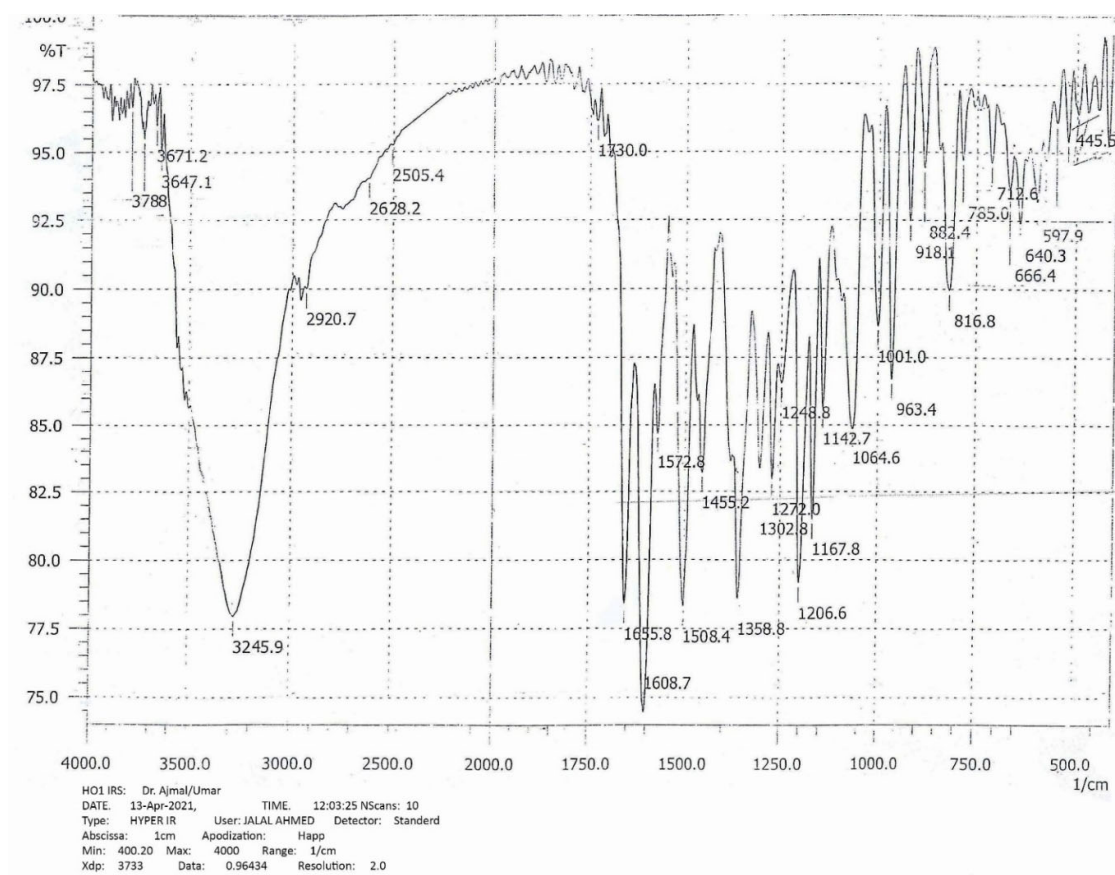

Figure S2. IR spectrum of compound 1.

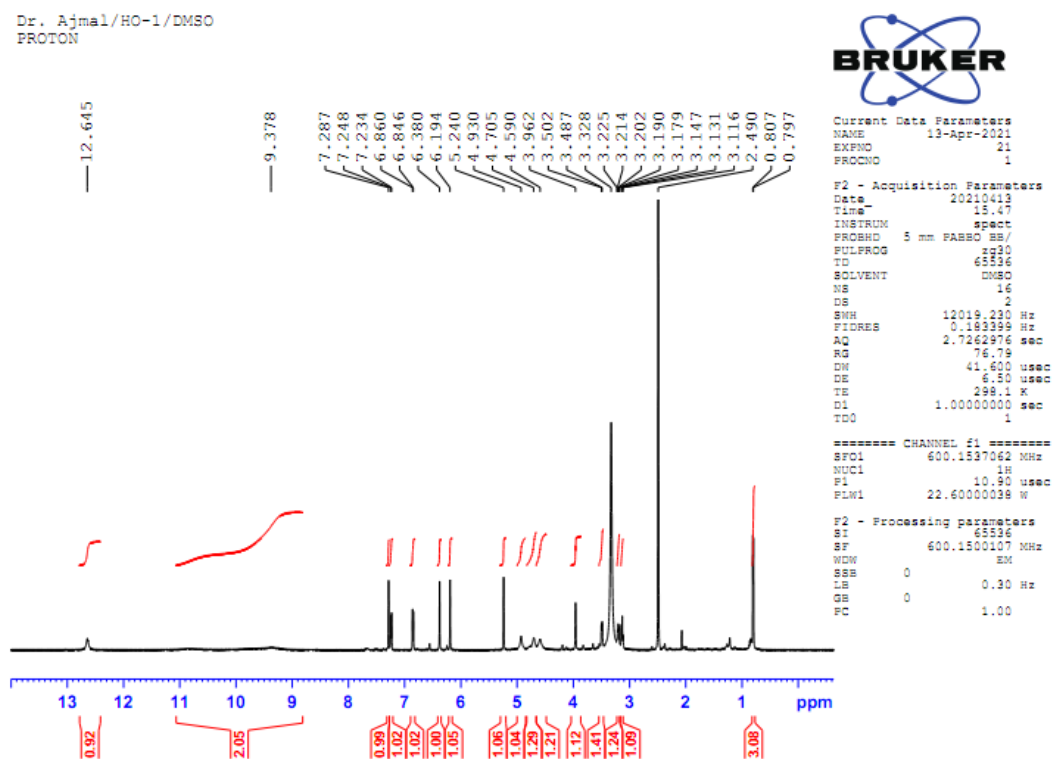Figure S3. <sup>1</sup>H NMR spectrum of compound 1.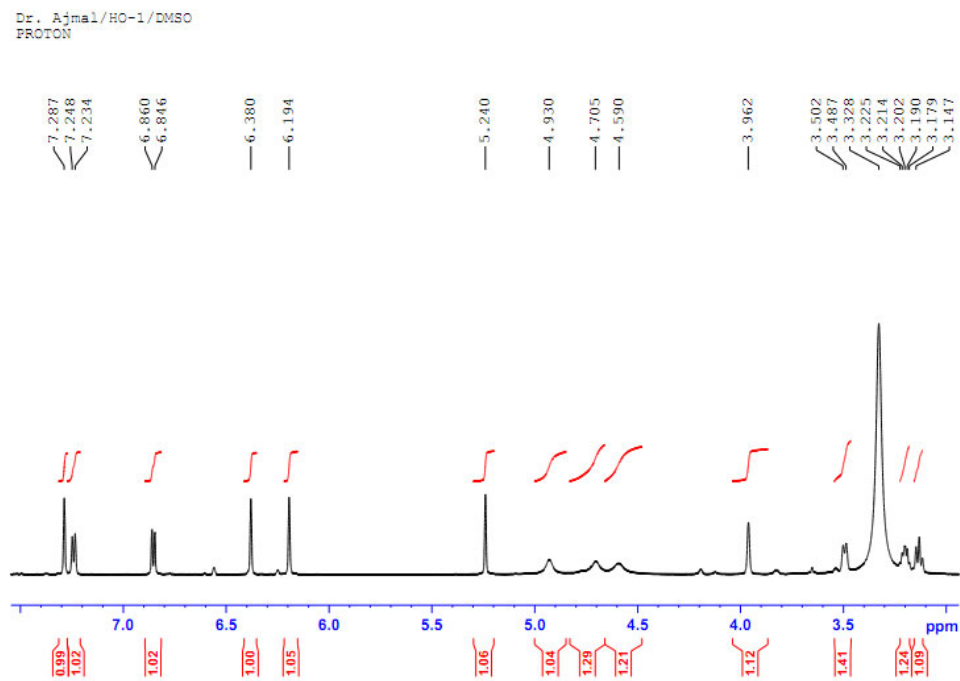Figure S4. <sup>1</sup>H NMR spectrum of compound 1.

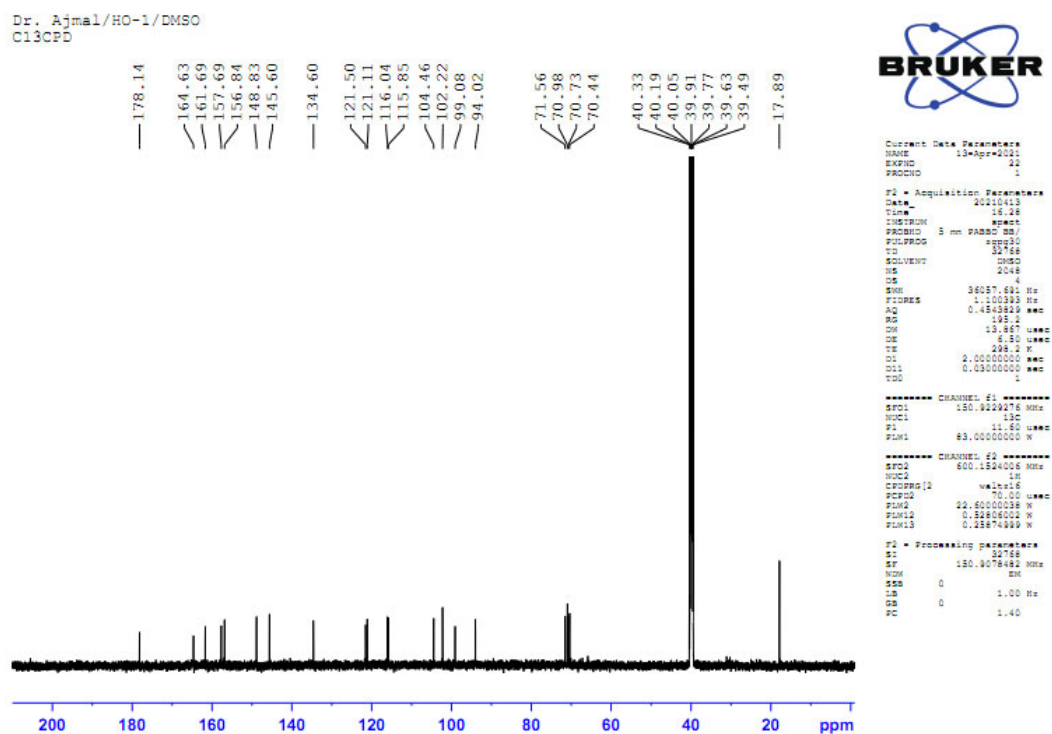Figure S5.  $^{13}\text{C}$  NMR spectrum of compound1.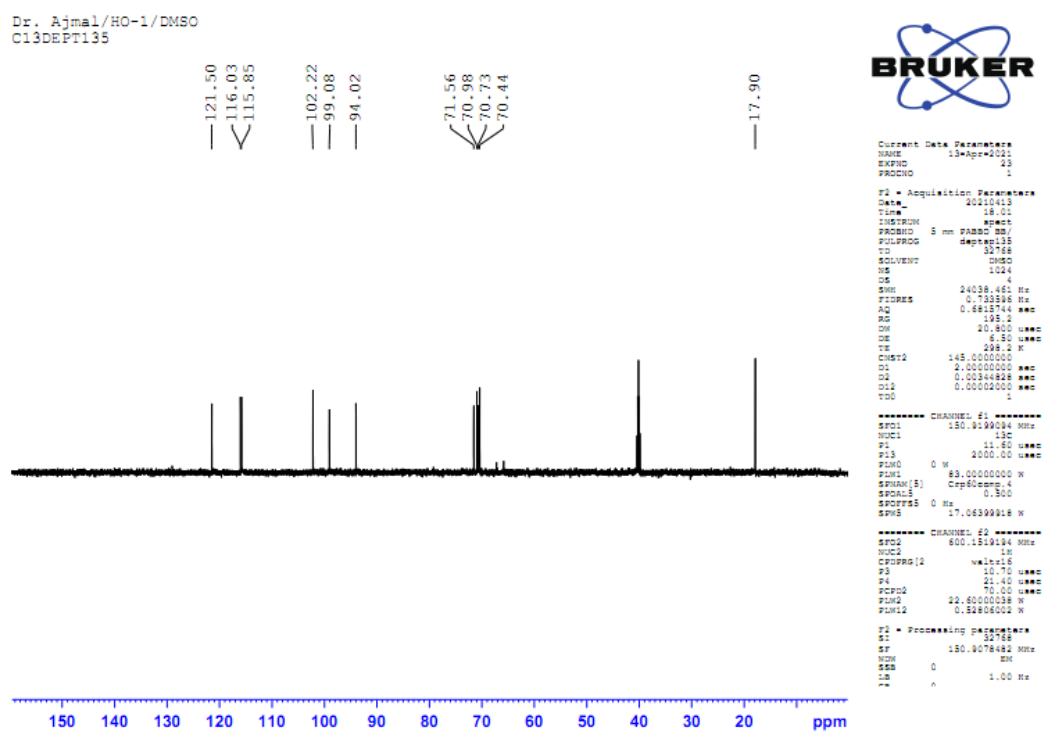Figure S6.  $^{13}\text{C}$  DEPT 135 NMR spectrum of compound 1.

Dr. Ajmal/HO-1/DMSO  
C13DEPT90

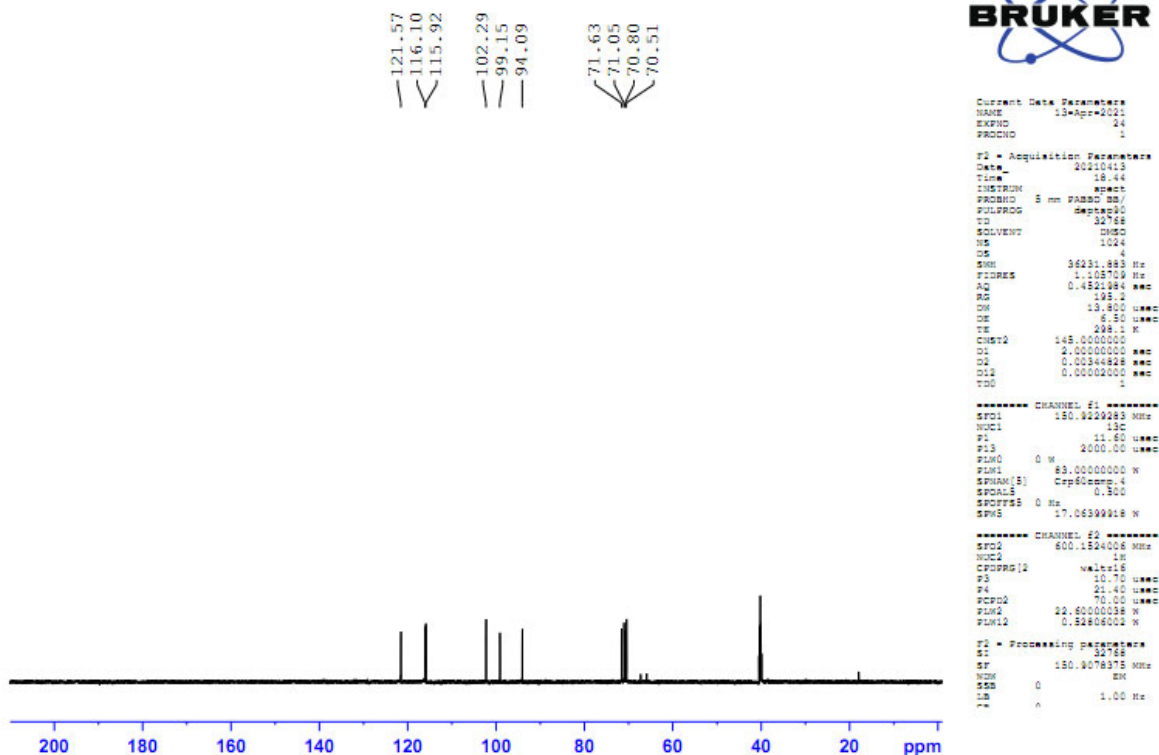

Figure S7.  $^{13}\text{C}$  DEPT 90 NMR spectrum of compound 1.

Dr. Ajmal/HO-1/DMSO  
COSYGPSW

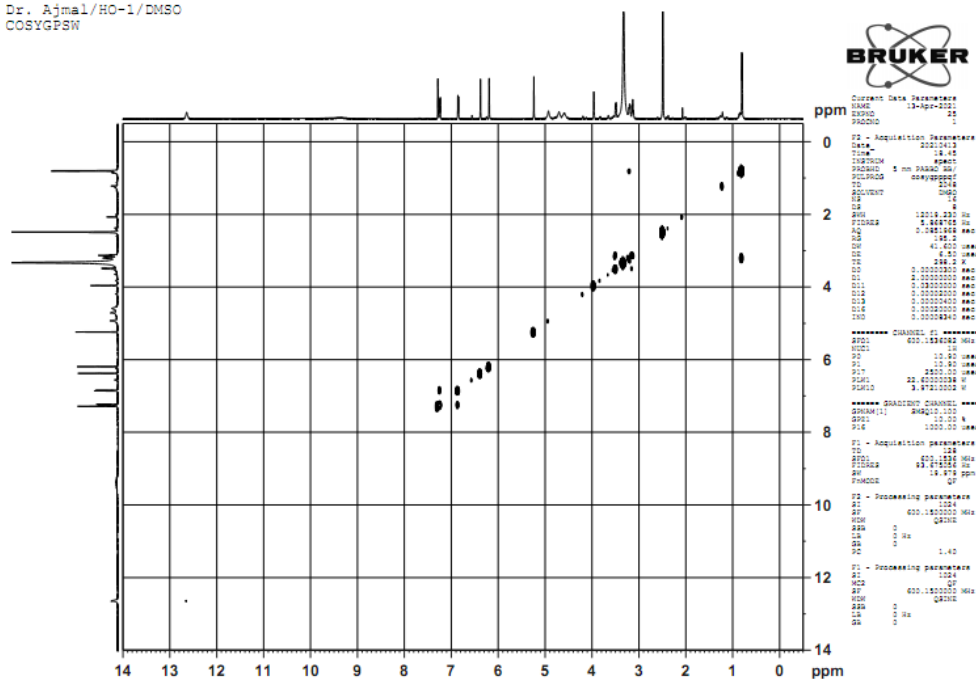

Figure S8. COSY spectrum of compound 1.

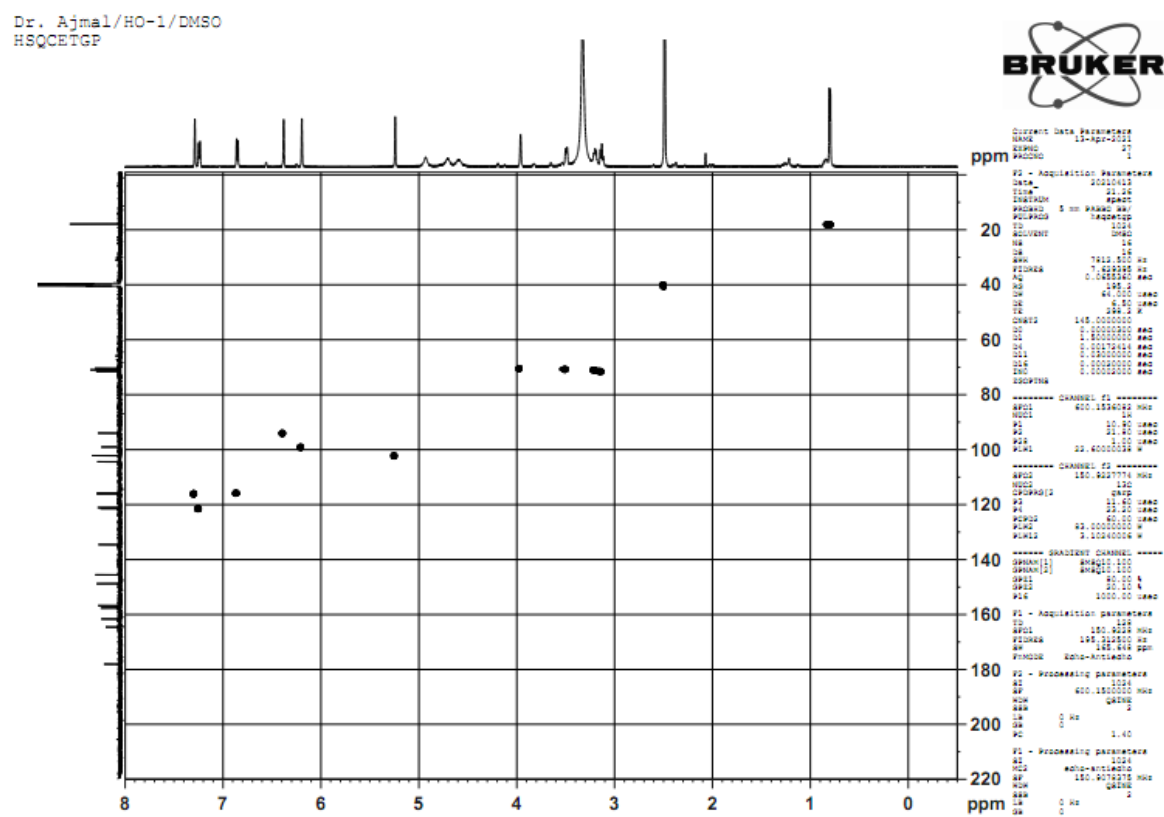

Dr. Ajmal/HO-1/DMSO  
HMBGPNPND

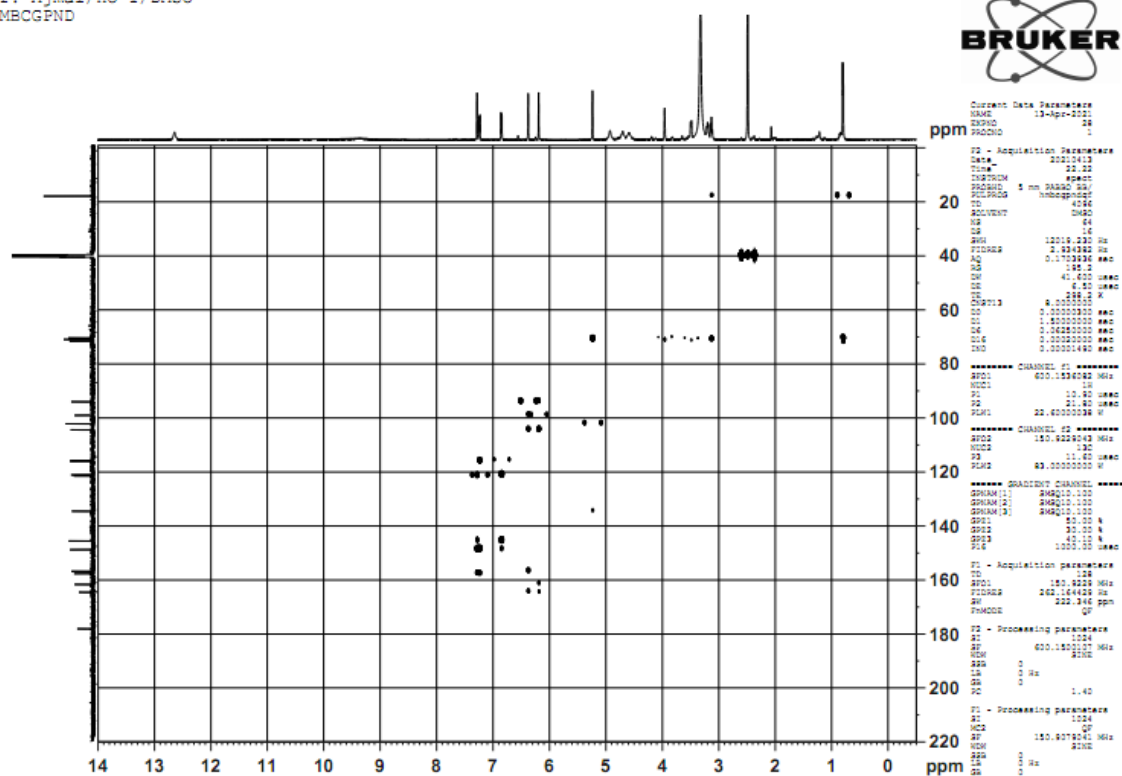

Figure S10. HMBC spectrum of compound 1.

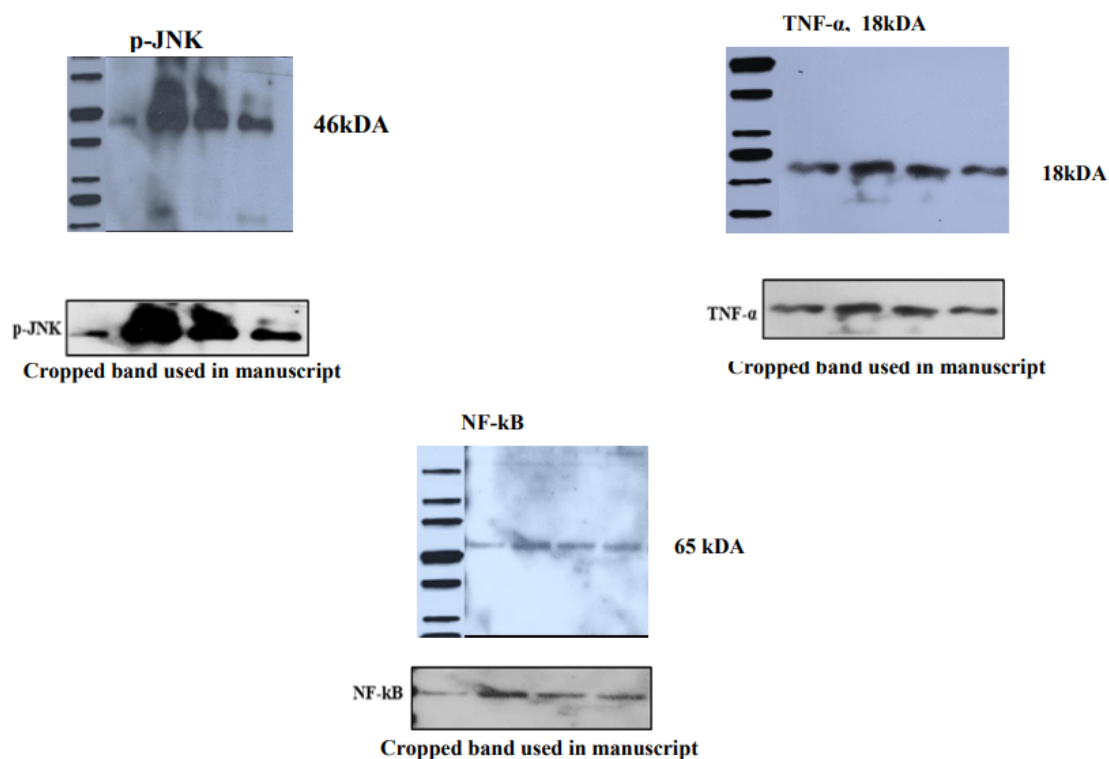

Figure S11. Folicitin inhibited neuroinflammatory markers in PND-7 pup brains.



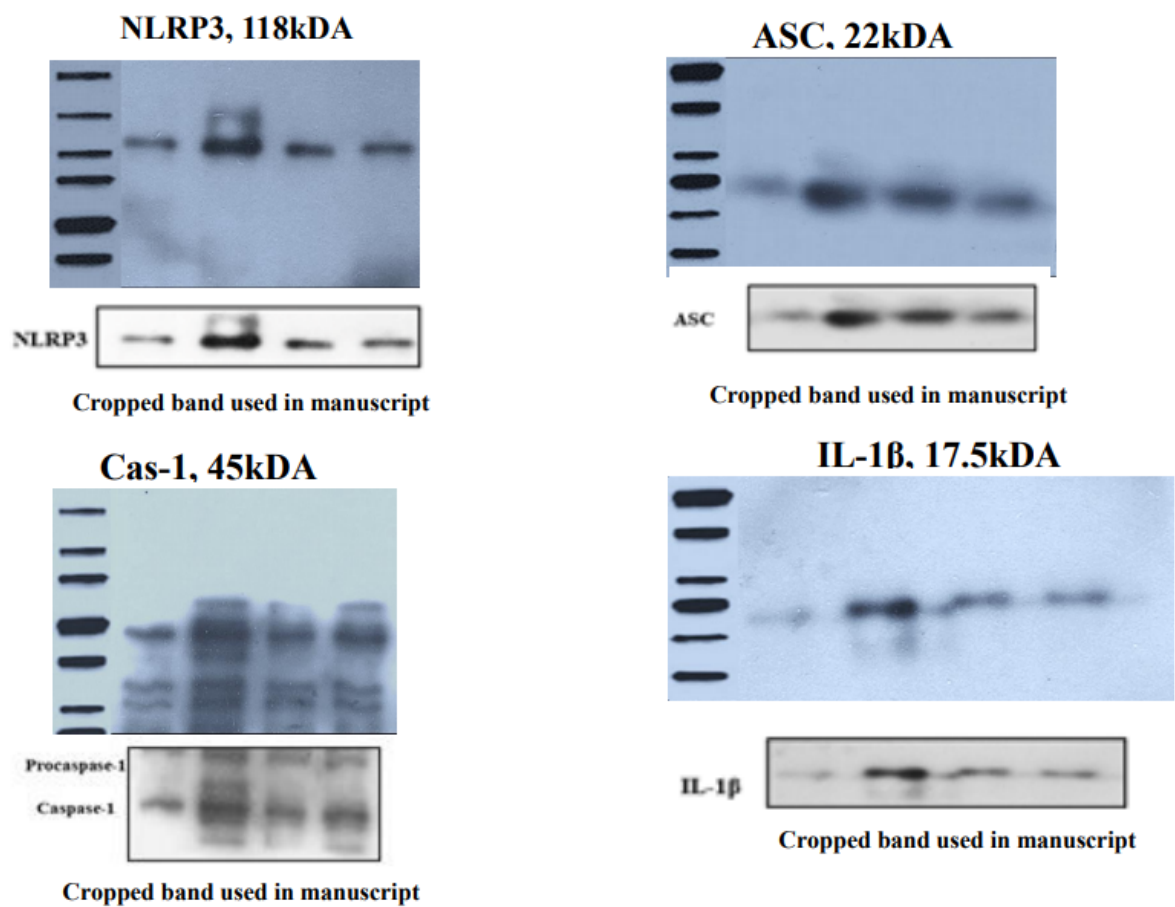

**Figure S12.** Figure 7. Folicitin deactivated NLRP3 inflammasome complex in PND-7 pup brains.

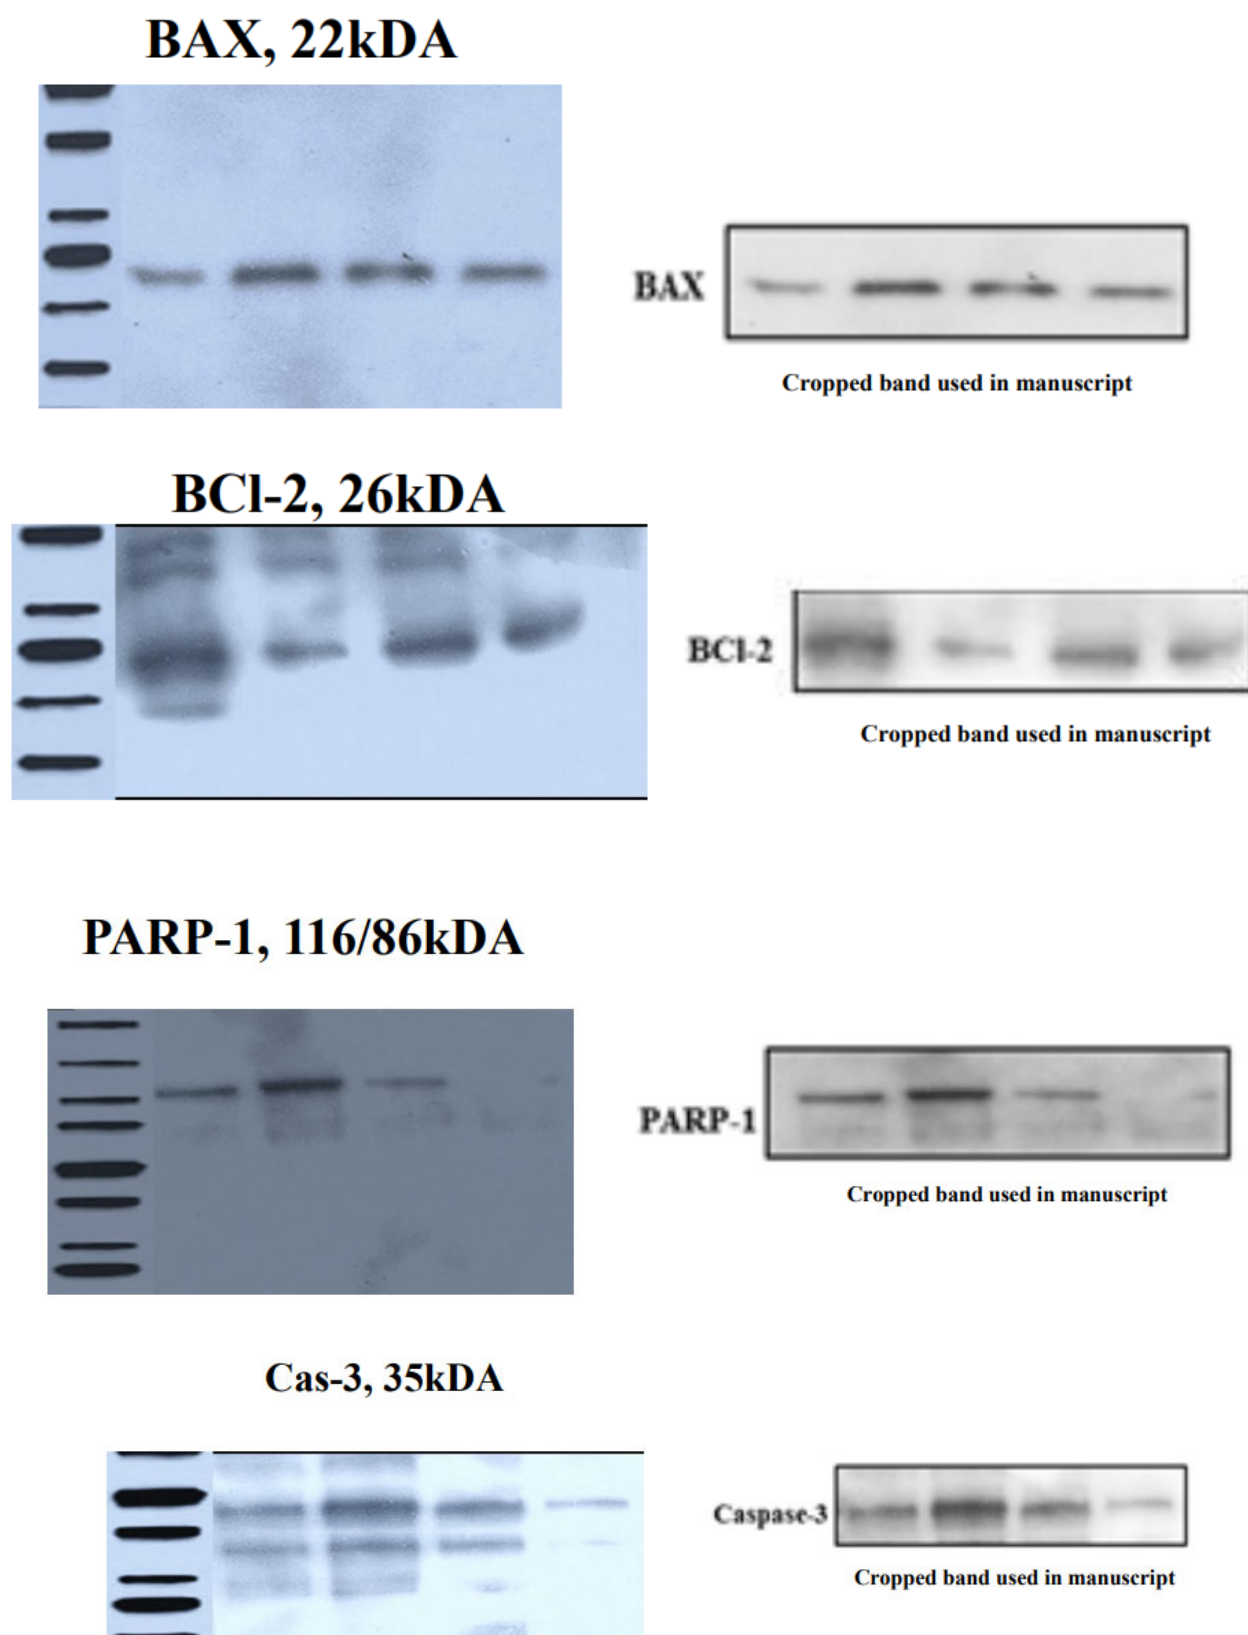

**Figure S13.** Figure 8. Folicitin reduced ethanol-induced neurodegeneration in PND-7 pup brains.
